# Supplementary material
Source: Springer Nature journal article supplement (https://www.springermedizin.de/resource/supplementary/12885_2012_4027_MOESM1_ESM.pdf/9465002)

A

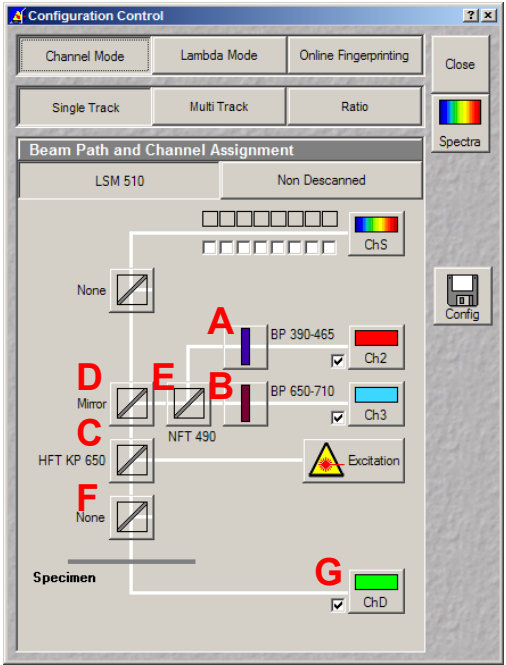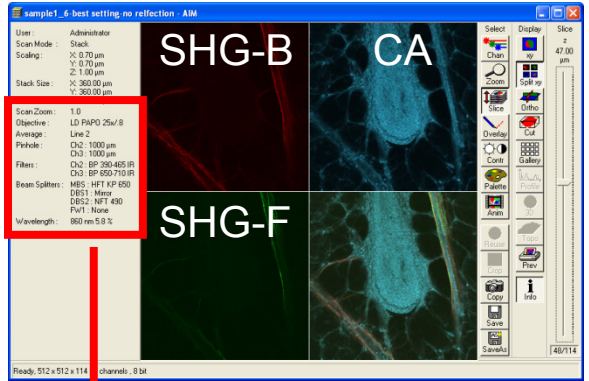

Scan Zoom : 1.0  
 Objective : LD PAPO 25x/.8  
 Average : Line 2  
 Pinhole : Ch2 : 1000 µm  
           Ch3 : 1000 µm  
 Filters : Ch2 : BP 390-465 IR  
           Ch3 : BP 650-710 IR  
 Beam Splitters : MBS : HFT KP 650  
                   DBS1 : Mirror  
                   DBS2 : NFT 490  
                   FW1 : None  
 Wavelength : 860 nm 5.8 %

ASCAN

G = NDD at ChD

B

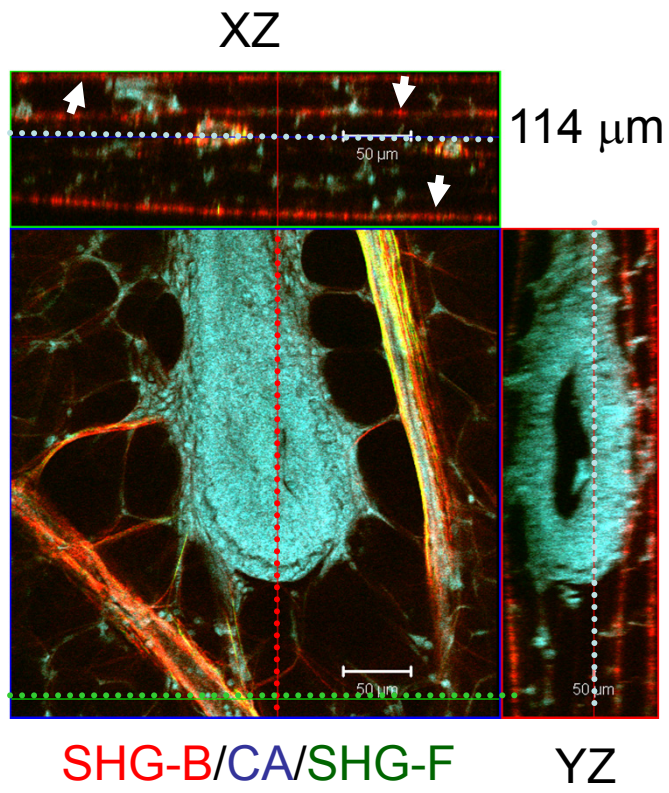

Supplement: MOESM1 [file 9465002]
